# Supplementary material
Source: PubMed Central journal article supplement (PMC2685333)

***p300<sup>fl/fl</sup>; Ren<sup>cre/+</sup>***

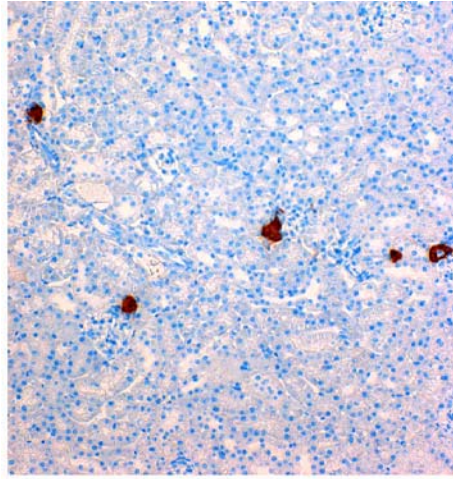

**Supplemental Figure S1 Gomez *et al.***

Supplement: 01266.2008_1.pdf [file 01266.2008_1.pdf]

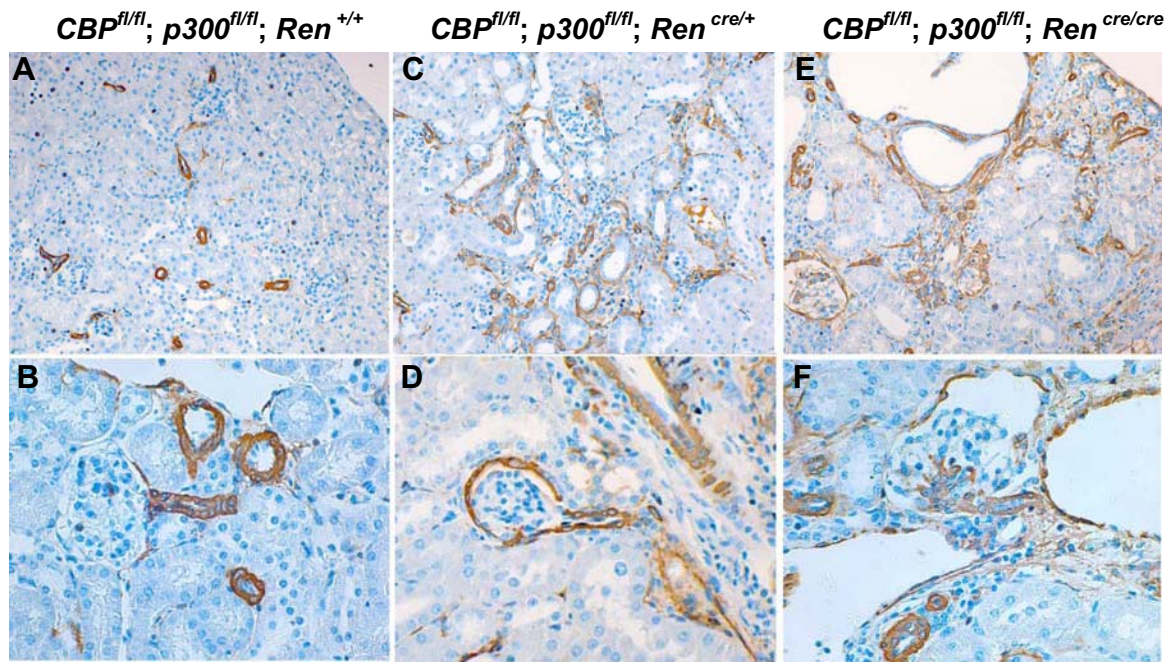

**Supplemental Figure S2 Gomez, et al.**

Supplement: 01266.2008_2.pdf [file 01266.2008_2.pdf]

***CBP<sup>fl/fl</sup>; p300<sup>fl/fl</sup>; Ren<sup>cre/+</sup>***

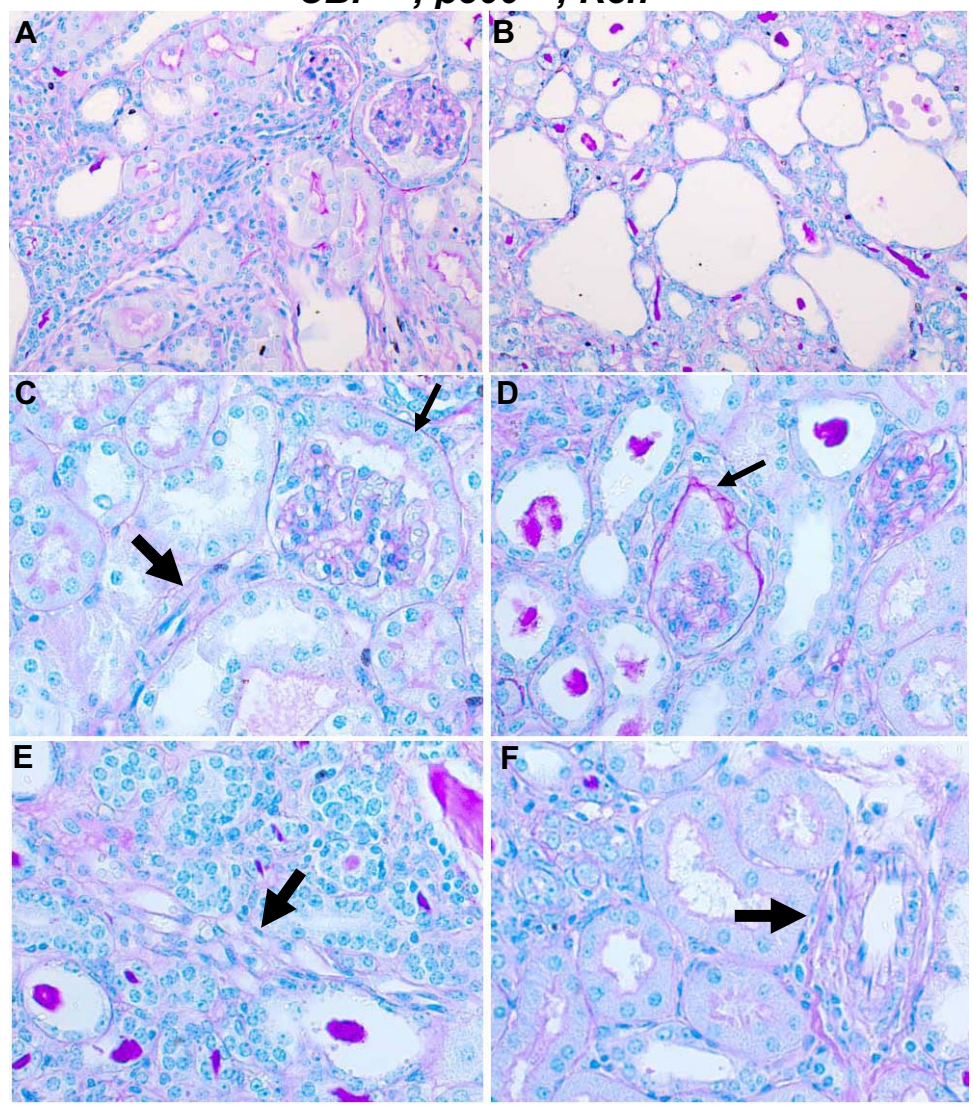

**Supplemental Figure S3 Gomez, et al.**

Supplement: 01266.2008_3.pdf [file 01266.2008_3.pdf]

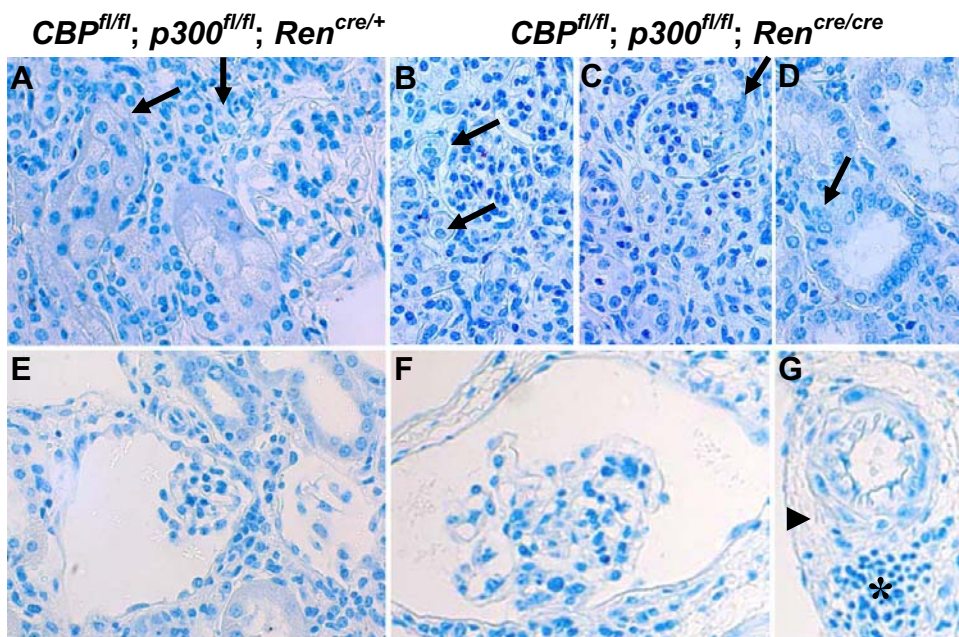

Supplemental Figure S4 Gomez, et al.

Supplement: 01266.2008_4.pdf [file 01266.2008_4.pdf]
